# Supplementary material for: The influence of carbon sources on the expression of the recA gene and genotoxicity detection by an Acinetobacter bioreporter
Source: Royal Society of Chemistry journal article supplement (doi:10.1039/c4em00692e), 2015-01-01
Supplement: c4em00692e2.xlsx [file c4em00692e2.xlsx]

## Sheet: Sheet1
No.	ACIAD number	Total	%Cov(95)	Accession	Name	Peptides(95%)	subcelluar location	molecular function	biological process	ligand
DNA damage-related genes
2	ACIAD_0307	147.8	50.39	gi|648275842	DNA-directed RNA polymerase subunit beta' [Acinetobacter baylyi]	92	DNA-directed RNA polymerase	Chaperone; Nucleotidyltransferase, Transferase	Transcription
3	ACIAD_0308	138.57	51.84	gi|50083579	DNA-directed RNA polymerase subunit beta [Acinetobacter sp. ADP1]	88	DNA-directed RNA polymerase	Chaperone; Nucleotidyltransferase, Transferase	Transcription
11	ACIAD_0316	97.27	76.56	gi|50083587	heat shock protein 90 [Acinetobacter sp. ADP1]	98	cytoplasm	Chaperone	Stress response	ATP-binding, Nucleotide-binding
246	ACIAD_3159	28.28	36.67	gi|50086160	phosphate starvation-inducible protein (PhoH-like) [Acinetobacter sp. ADP1]	15		ATP binding
482	ACIAD_3408	18.2	27.65	gi|50086382	DNA/RNA non-specific endonuclease G protein [Acinetobacter sp. ADP1]	8		Endonuclease; Hydrolase, Nuclease
545	ACIAD_1368	15.3	20.37	gi|50084547	two-component regulatory system response regulator [Acinetobacter sp. ADP1]	8		DNA-binding	Transcription, Transcription regulation; Two-component regulatory system	DNA-binding
other genes
13	ACIAD_2838	96.04	60.85	gi|50085881	chaperonin GroEL [Acinetobacter sp. ADP1]	134	Cytoplasm	Chaperone
36	ACIAD_2008	66.85	40.97	gi|50085143	aminopeptidase N [Acinetobacter sp. ADP1]	43		Aminopeptidase;Hydrolase;Protease
47	ACIAD_1163	60.36	44.86	gi|50083770	ferric siderophore receptor protein [Acinetobacter sp. ADP1]	32	membrane	receptor
61	ACIAD_0164	55.48	55.03	gi|50083449	arginyl-tRNA synthetase [Acinetobacter sp. ADP1]	34	Cytoplasm	Aminoacyl-tRNA synthetase, Ligase
75	ACIAD_0151	49.85	57.64	gi|50083437	GMP synthase [Acinetobacter sp. ADP1]	31		Ligase
83	ACIAD_2652	48.56	28.49	gi|50085721	DNA gyrase, subunit A, type II topoisomerase [Acinetobacter sp. ADP1]	24	Cytoplasm	Isomerase, Topoisomerase
85	ACIAD_3232	46.86	29.63	gi|50086227	glycerol-3-phosphate acyltransferase [Acinetobacter sp. ADP1]	25	Cell inner membrane	Acyltransferase, Transferase	Lipid biosynthesis, Lipid metabolism, Phospholipid biosynthesis;Phospholipid metabolism
102	ACIAD_3245	43.16	35.47	gi|50086240	ATP-dependent RNA helicase [Acinetobacter sp. ADP1]	23		Helicase
112	ACIAD_1069	42.7	42.04	gi|50084268	lysyl-tRNA synthetase [Acinetobacter sp. ADP1]	25	Cytoplasm	Aminoacyl-tRNA synthetase, Ligase	Protein biosynthesis	ATP-binding, Magnesium, Metal-binding, Nucleotide-binding
121	ACIAD_1646	40.92	16.48	gi|50084804	bifunctional proline dehydrogenase/pyrroline-5-carboxylate dehydrogenase [Acinetobacter sp. ADP1]	19
127	ACIAD_3216	39.48	58.03	gi|50086212	50S ribosomal protein L2 [Acinetobacter sp. ADP1]	43	large ribosomal subunit	Ribonucleoprotein, Ribosomal protein	translation	RNA-binding, rRNA-binding
144	ACIAD_1700	38.51	33.56	gi|50083856	acyl-CoA dehydrogenase [Acinetobacter sp. ADP1]	20		Oxidoreductase		FAD
150	ACIAD_3446	37.11	50.47	gi|50086410	4-aminobutyrate aminotransferase, PLP-dependent [Acinetobacter sp. ADP1]	24		Aminotransferase; transferase	gamma-aminobutyric acid metabolic process	Pyridoxal phosphate
178	ACIAD_3195	34.82	61.35	gi|50086191	30S ribosomal protein S4 [Acinetobacter sp. ADP1]	26	small ribosomal subunit	Ribonucleoprotein, Ribosomal protein	translation	RNA-binding, rRNA-binding
180	ACIAD_2116	35.3	26.85	gi|50084254	ferric siderophore receptor protein [Acinetobacter sp. ADP1]	17	Cell outer membrane	receptor
210	ACIAD_1240	31.82	28.44	gi|50085235	ferric siderophore receptor protein [Acinetobacter sp. ADP1]	15	Cell outer membrane	receptor
223	ACIAD_1007	30.14	34.62	gi|50084210	malate:quinone oxidoreductase [Acinetobacter sp. ADP1]	15		Oxidoreductase	Tricarboxylic acid cycle	FAD, Flavoprotein
227	ACIAD_1744	30.19	35.79	gi|491065116	aspartate ammonia-lyase [Acinetobacter baylyi]	16		Lyase	Tricarboxylic acid cycle
245	ACIAD_1194	27.99	16.2	gi|50084383	protease [Acinetobacter sp. ADP1]	14		Hydrolase, Metalloprotease, Protease	Stress response	Metal-binding, Zinc
293	ACIAD_1279	25.66	16.41	gi|50084464	cyanophycin synthetase [Acinetobacter sp. ADP1]	12		Ligase	macromolecule biosynthetic process
298	ACIAD_0108	24.57	40.1	gi|50083398	L-lactate dehydrogenase [Acinetobacter sp. ADP1]	14		Oxidoreductase	lactate oxidation	Flavoprotein, FMN
359	ACIAD_3342	21.83	23.89	gi|50086323	biotin carboxylase-like protein [Acinetobacter sp. ADP1]	11
380	ACIAD_0520	20.95	19.67	gi|50083758	phosphatase; alkaline phosphatase [Acinetobacter sp. ADP1]	9
392	ACIAD_0116	20.29	35.62	gi|50083405	alanine racemase 2, PLP-binding, catabolic [Acinetobacter sp. ADP1]	11
405	ACIAD_3445	19.79	25.73	gi|50086409	NADP+-dependent succinate semialdehyde dehydrogenase [Acinetobacter sp. ADP1]	12		Oxidoreductase	gamma-aminobutyric acid catabolic process
413	ACIAD_0302	19.27	67.61	gi|50083575	50S ribosomal protein L11 [Acinetobacter sp. ADP1]	14	ribosome	Ribonucleoprotein, Ribosomal protein	translation	RNA-binding, rRNA-binding
445	ACIAD_3575	18.06	22.47	gi|50086528	bifunctional UDP-N-acetylglucosamine pyrophosphorylase/glucosamine-1-phosphate N-acetyltransferase [Acinetobacter sp. ADP1]	10
457	ACIAD_0769	17.78	29.54	gi|50083985	nucleoside-specific channel-forming protein [Acinetobacter sp. ADP1]	9	cell outer membrane	transporter
474	ACIAD_3341	17.55	8.934	gi|50086322	arginine/lysine/ornithine decarboxylase [Acinetobacter sp. ADP1]	8		Lyase
575	ACIAD_0773	14.23	28.87	gi|50083988	MTA/SAH nucleosidase [Acinetobacter sp. ADP1]	11		Glycosidase; Hydrolase	nucleoside metabolic process
604	ACIAD_0502	15.16	57.69	gi|690976840	50S ribosomal protein L28 [Acinetobacter baumannii]	11	ribosome	Ribonucleoprotein, Ribosomal protein	translation
640	ACIAD_1003	13.03	9.29	gi|50084427	ferric siderophore receptor protein [Acinetobacter sp. ADP1]	6	Cell outer membrane	receptor
643	ACIAD_1284	13.05	26.8	gi|50084469	bifunctional succinylornithine transaminase/acetylornithine transaminase [Acinetobacter sp. ADP1]	7		Aminotransferase	arginine metabolic process	Pyridoxal phosphate
656	ACIAD_2517	14.26	18.4	gi|50085596	bifunctional biotin carboxylase/biotin carboxyl carrier protein [Acinetobacter sp. ADP1]	9		ligase		biotin
678	ACIAD_3669	12.2	39.25	gi|50086609	hypoxanthine phosphoribosyltransferase [Acinetobacter sp. ADP1]	6	Cytoplasm	Glycosyltransferase; Transferase	purine ribonucleoside salvage
681	ACIAD_1215	12.31	23.1	gi|50084404	phosphate transporter ATP-binding protein [Acinetobacter sp. ADP1]	7		Hydrolase	Phosphate transport, Transport	ATP-binding, Nucleotide-binding
683	ACIAD_1743	13.69	16.52	gi|50084895	oxydoreductase protein, zinc-containing (quinone oxidoreductase, NADPH dependent) [Acinetobacter sp. ADP1]	8		Oxidoreductase
710	ACIAD_3206	12.71	45.54	gi|50086202	30S ribosomal protein S14 [Acinetobacter sp. ADP1]	12		Ribonucleoprotein, Ribosomal protein	translation	RNA-binding, rRNA-binding
753	ACIAD_3164	10.72	33.51	gi|491062609	xanthine phosphoribosyltransferase [Acinetobacter]	6	Cytoplasm	Glycosyltransferase, Transferase	Purine salvage
759	ACIAD_3212	11.52	52.55	gi|50086208	50S ribosomal protein L16 [Acinetobacter sp. ADP1]	9	ribosome	Ribonucleoprotein, Ribosomal protein	translation	RNA-binding, rRNA-binding, tRNA-binding
797	ACIAD_2368	10.07	22.64	gi|50085458	16S rRNA methyltransferase GidB [Acinetobacter sp. ADP1]	5	Cytoplasm	Methyltransferase, Transferase	rRNA processing	S-adenosyl-L-methionine
805		10.03	16.62	gi|648275807	hypothetical protein [Acinetobacter baylyi]	5
816	ACIAD_3381	9.96	10.82	gi|50086357	pyruvate dehydrogenase (cytochrome) [Acinetobacter sp. ADP1]	5		Oxidoreductase		pyruvate
823	ACIAD_0508	10.64	21.74	gi|50083746	biopolymer transport protein (ExbB) [Acinetobacter sp. ADP1]	7	membrane	transporter	Protein transport; transport
871	ACIAD_1288	9.1	13.45	gi|50084472	succinylarginine dihydrolase [Acinetobacter sp. ADP1]	4		Hydrolase	Arginine metabolism
915	ACIAD_1764	8.32	7.104	gi|50085419	ferric siderophore receptor protein [Acinetobacter sp. ADP1]	4	Cell outer membrane	receptor
917	ACIAD_0115	8.24	10.5	gi|50083404	D-amino acid dehydrogenase small subunit [Acinetobacter sp. ADP1]	4		Oxidoreductase
962	ACIAD_1280	7.97	7.524	gi|50084465	exopeptidase [Acinetobacter sp. ADP1]	5
969	ACIAD_0965	7.66	8.398	gi|50084170	hypothetical protein ACIAD0965 [Acinetobacter sp. ADP1]	4
976	ACIAD_0881	8.28	32.26	gi|490921412	30S ribosomal protein S12 [Acinetobacter]	5	small ribosomal subunit	Ribonucleoprotein, Ribosomal protein		RNA-binding, rRNA-binding, tRNA-binding
1030	ACIAD_1649	7.78	9.256	gi|50084806	SSS family major sodium/proline symporter [Acinetobacter sp. ADP1]	5	membrane	transporter	transport
1155	ACIAD_1398	5.61	28.09	gi|50084567	30S ribosomal protein S20 [Acinetobacter sp. ADP1]	7	ribosome	Ribonucleoprotein, Ribosomal protein		RNA-binding, rRNA-binding, tRNA-binding
1316	ACIAD_3026	4.16	7.857	gi|648275683	mechanosensitive ion channel protein MscS [Acinetobacter baylyi]	2	membrane	transporter	transmembrane transport
1	ACIAD_0940	199.74	35.65	gi|50084147	hemagglutinin/hemolysin-related protein [Acinetobacter sp. ADP1]	100
4	ACIAD_2395	134.85	62.57	gi|50085482	bifunctional aconitate hydratase 2/2-methylisocitrate dehydratase [Acinetobacter sp. ADP1]	145		hydratase
5	ACIAD_3350	117.47	42.26	gi|50086330	glutamate synthase subunit alpha [Acinetobacter sp. ADP1]	68	Cytoplasm	Acyltransferase, Transferase
6	ACIAD_2861	107.21	49.86	gi|50085901	carbamoyl-phosphate synthase, large subunit [Acinetobacter sp. ADP1]	60		ligase
17	ACIAD_0948	92.02	37.97	gi|50085906	hemagglutinin/hemolysin-related protein [Acinetobacter sp. ADP1]	100
20	ACIAD_2880	87.99	65.19	gi|50085918	succinate dehydrogenase flavoprotein subunit [Acinetobacter sp. ADP1]	70		Oxidoreductase
29	ACIAD_2335	70.67	48.47	gi|50085427	malate synthase G [Acinetobacter sp. ADP1]	66	Cytoplasm	Acyltransferase, Transferase
35	ACIAD_	67.18	45.31	gi|648275770	hypothetical protein [Acinetobacter baylyi]	33
40	ACIAD_0530	62.66	57.35	gi|50083768	2-isopropylmalate synthase [Acinetobacter sp. ADP1]	38		Acyltransferase, Transferase
46	ACIAD_2542	60.38	58.65	gi|50085153	aldehyde dehydrogenase [Acinetobacter sp. ADP1]	46		Oxidoreductase
53	ACIAD_3102	59	74.26	gi|50086106	ketol-acid reductoisomerase [Acinetobacter sp. ADP1]	58		Oxidoreductase
71	ACIAD_3612	50.32	62.82	gi|50085150	alcohol dehydrogenase [Acinetobacter sp. ADP1]	51		Oxidoreductase
73	ACIAD_0538	50.19	53.94	gi|50083776	fumarate hydratase [Acinetobacter sp. ADP1]	32	Cytoplasm	Lyase
80	ACIAD_3523	48.07	61.05	gi|50086479	5-methyltetrahydropteroyltriglutamate--homocysteine methyltransferase [Acinetobacter sp. ADP1]	37		Acyltransferase, Transferase
81	ACIAD_2287	47.92	34.39	gi|50085386	malic enzyme [Acinetobacter sp. ADP1]	29		Oxidoreductase
103	ACIAD_0463	43.86	46.75	gi|50083710	isopropylmalate isomerase large subunit [Acinetobacter sp. ADP1]	24		Lyase	Amino-acid biosynthesis, Branched-chain amino acid biosynthesis, Leucine biosynthesis	4Fe-4S, Iron, Iron-sulfur, Metal-binding
109	ACIAD_2458	42.05	40.13	gi|50085541	glutamine synthetase [Acinetobacter sp. ADP1]	39	Cytoplasm	Ligase	glutamine biosynthetic process; nitrogen fixation	ATP-binding, Nucleotide-binding
114	ACIAD_1073	41.15	37.8	gi|50084272	ATP-sulfurylase, subunit 1 [Acinetobacter sp. ADP1]	21
115	ACIAD_3349	40.97	47.15	gi|50086329	glutamate synthase subunit beta [Acinetobacter sp. ADP1]	23	Cell outer membrane	synthase	glutamate biosynthetic process
129	ACIAD_3636	39.15	33	gi|50084452	dihydroxy-acid dehydratase [Acinetobacter sp. ADP1]	22		Lyase	Amino-acid biosynthesis, Branched-chain amino acid biosynthesis	4Fe-4S, Iron, Iron-sulfur, Metal-binding
130	ACIAD_3104	39.03	41.11	gi|50086108	acetolactate synthase 3 catalytic subunit [Acinetobacter sp. ADP1]	24		Transferase
133	ACIAD_3355	38.95	35.96	gi|50086334	outer membrane protein (ComQ) [Acinetobacter sp. ADP1]	22	Cell outer membrane	transporter	pilus assembly
153		37.53	33.82	gi|491079582	hypothetical protein [Acinetobacter soli]	20
154	ACIAD_0276	36.9	34.39	gi|50083553	thiamine biosynthesis protein ThiC [Acinetobacter sp. ADP1]	19		Lyase	Thiamine biosynthesis	4Fe-4S, Iron, Iron-sulfur, Metal-binding, S-adenosyl-L-methionine, Zinc
157	ACIAD_1110	36.75	46.72	gi|648275790	glutamate dehydrogenase [Acinetobacter baylyi]	18		Oxidoreductase	cellular amino acid metabolic process
171	ACIAD_1187	36.48	51.15	gi|50084379	isocitrate dehydrogenase [Acinetobacter sp. ADP1]	18		Oxidoreductase	tricarboxylic acid cycle	Magnesium
172	ACIAD_3360	35.56	33.96	gi|648275801	membrane protein [Acinetobacter baylyi]	16	membrane
179	ACIAD_1488	35.43	26.19	gi|50084659	protein secretion efflux system ABC transporter ATP-binding/membrane protein [Acinetobacter sp. ADP1]	18	membrane	transporter	protein secretion; transmembrane transport
205	ACIAD_1489	34	49.75	gi|50084660	protein secretion efflux system ABC transporter [Acinetobacter sp. ADP1]	20	membrane	transporter	protein secretion
214	ACIAD_1715	31.06	76.02	gi|50085671	porin [Acinetobacter sp. ADP1]	36	integral component of membrane	porin activity
232	ACIAD_2689	29.24	76.65	gi|50085755	hypothetical protein ACIAD2689 [Acinetobacter sp. ADP1]	29
238	ACIAD_1270	28.54	45.86	gi|50084456	aspartate carbamoyltransferase catalytic subunit [Acinetobacter sp. ADP1]	16		Transferase	de novo' pyrimidine nucleobase biosynthetic process; cellular amino acid metabolic process
241	ACIAD_3475	28.21	26.34	gi|50086436	acetyl-CoA synthetase [Acinetobacter sp. ADP1]	17		Ligase	acetyl-CoA biosynthetic process from acetate	ATP-binding; Magnesium; Metal-binding; Nucleotide-binding
252	ACIAD_1266	28.05	23.89	gi|50086579	dihydroxy-acid dehydratase [Acinetobacter sp. ADP1]	13		Lyase	Amino-acid biosynthesis, Branched-chain amino acid biosynthesis	4Fe-4S, Iron, Iron-sulfur, Metal-binding
257	ACIAD_1018	27.62	46.61	gi|50084220	acetoin:2,6-dichlorophenolindophenol oxidoreductase alpha subunit [Acinetobacter sp. ADP1]	13		Oxidoreductase
259	ACIAD_0860	27.09	43.67	gi|50084072	hypothetical protein ACIAD0860 [Acinetobacter sp. ADP1]	15
287	ACIAD_2480	25.12	32.92	gi|50085560	hypothetical protein ACIAD2480 [Acinetobacter sp. ADP1]	15
288	ACIAD_0634	25.31	26.62	gi|50083867	vitamin B12 receptor precursor [Acinetobacter sp. ADP1]	21
322	ACIAD_0469	23.84	33.98	gi|50083714	3-isopropylmalate dehydrogenase [Acinetobacter sp. ADP1]	14	Cytoplasm	Oxidoreductase	Amino-acid biosynthesis, Branched-chain amino acid biosynthesis, Leucine biosynthesis	Magnesium, Manganese, Metal-binding, NAD
351	ACIAD_1270	22.66	36.01	gi|50084457	aspartate carbamoyltransferase [Acinetobacter sp. ADP1]	13		Transferase	Pyrimidine biosynthesis
353	ACIAD_2015	22.39	39.07	gi|50086320	alcohol dehydrogenase [Acinetobacter sp. ADP1]	13		Oxidoreductase
397	ACIAD_0466	20.4	58.8	gi|50083712	isopropylmalate isomerase small subunit [Acinetobacter sp. ADP1]	14	3-isopropylmalate dehydratase complex	Lyase	Amino-acid biosynthesis, Branched-chain amino acid biosynthesis, Leucine biosynthesis
418	ACIAD_3382	19.12	26.23	gi|50086358	homocysteine synthase [Acinetobacter sp. ADP1]	10		Transferase		Pyridoxal phosphate
427	ACIAD_1072	18.8	32.57	gi|50084271	sulfate adenylyltransferase subunit 2 [Acinetobacter sp. ADP1]	10		Nucleotidyltransferase, Transferase	hydrogen sulfide biosynthetic process; sulfate assimilation; sulfate reduction	ATP-binding, Nucleotide-binding
429	ACIAD_1272	18.93	30.38	gi|50084458	hypothetical protein ACIAD1272 [Acinetobacter sp. ADP1]	9
437	ACIAD_0911	18.65	29.5	gi|50084119	twitching motility protein [Acinetobacter sp. ADP1]	9		ATP binding	transporter
446	ACIAD_1064	17.92	45.54	gi|50083982	hydrolase [Acinetobacter sp. ADP1]	10		Hydrolase
454	ACIAD_2048	17.89	56.91	gi|50085177	bacterioferritin (cytochrome b1) [Acinetobacter sp. ADP1]	17		ferric iron binding	cellular iron ion homeostasis
522	ACIAD_3330	15.93	63.64	gi|50084064	bacterioferritin [Acinetobacter sp. ADP1]	9		ferric iron binding	cellular iron ion homeostasis	Iron storage
553		15.58	31.8	gi|648275840	hypothetical protein [Acinetobacter baylyi]	13
582	ACIAD_3103	14.4	52.76	gi|50086107	acetolactate synthase 3 regulatory subunit [Acinetobacter sp. ADP1]	12		Transferase	branched-chain amino acid biosynthetic process
595	ACIAD_0210	13.9	23.26	gi|50083492	hypothetical protein ACIAD0210 [Acinetobacter sp. ADP1]	8
618	ACIAD_1426	13.4	34.31	gi|50084603	salicylate esterase [Acinetobacter sp. ADP1]	7		hydrolase
634	ACIAD_2157	13.18	24.71	gi|50085270	hypothetical protein ACIAD2157 [Acinetobacter sp. ADP1]	7
686	ACIAD_0892	11.93	61.05	gi|50084102	hypothetical protein ACIAD0892 [Acinetobacter sp. ADP1]	6
737		10.97	22.38	gi|491062082	hypothetical protein [Acinetobacter baylyi]	5
769	ACIAD_0721	10.35	57.14	gi|50083943	hypothetical protein ACIAD0721 [Acinetobacter sp. ADP1]	8
802	ACIAD_3018	10.01	39.62	gi|50083884	lipoprotein [Acinetobacter sp. ADP1]	6
869	ACIAD_0388	8.99	26.38	gi|50083647	fimbrial chaperone protein [Acinetobacter sp. ADP1]	5	Periplasm	Chaperone	cell wall organization; chaperone-mediated protein folding; pilus organization
1144	ACIAD_1640	5.58	8.897	gi|50084798	antigen [Acinetobacter sp. ADP1]	2	Cell outer membrane
1170	ACIAD_2330	5.8	10.83	gi|50085019	phospho-2-dehydro-3-deoxyheptonate aldolase [Acinetobacter sp. ADP1]	3		transferase	amino-acid biosynthesis, Aromatic amino acid biosynthesis
1222	ACIAD_1451	5.19	13.16	gi|50084862	3-oxoadipate enol-lactonase [Acinetobacter sp. ADP1]	3		Hydrolase	Aromatic hydrocarbons catabolism
1412	ACIAD_3115	34.02	26.54	gi|50084937	VGR-like protein [Acinetobacter sp. ADP1]	19
Note: proteins that were downregulated were filled with green, and upregulated with red.
